# Supplementary material for: Loss of TRIM31 promotes breast cancer progression through regulating K48- and K63-linked ubiquitination of p53
Source: Springer Nature journal article supplement (doi:10.1038/s41419-021-04208-3), 2021-10-14
Supplement: 41419_2021_4208_MOESM1_ESM.pdf [file 41419_2021_4208_MOESM1_ESM.pdf]

## Supplementary Fig. S1

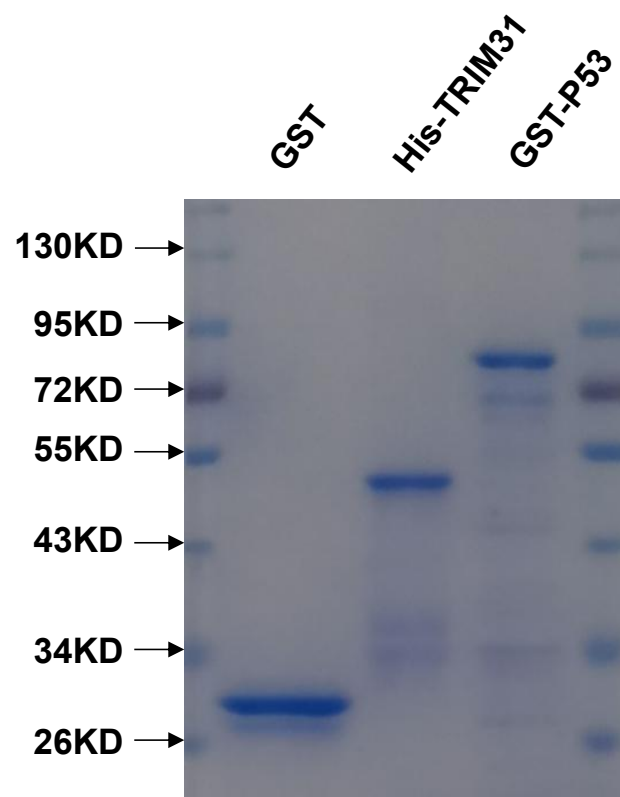

## Supplementary Fig. S2

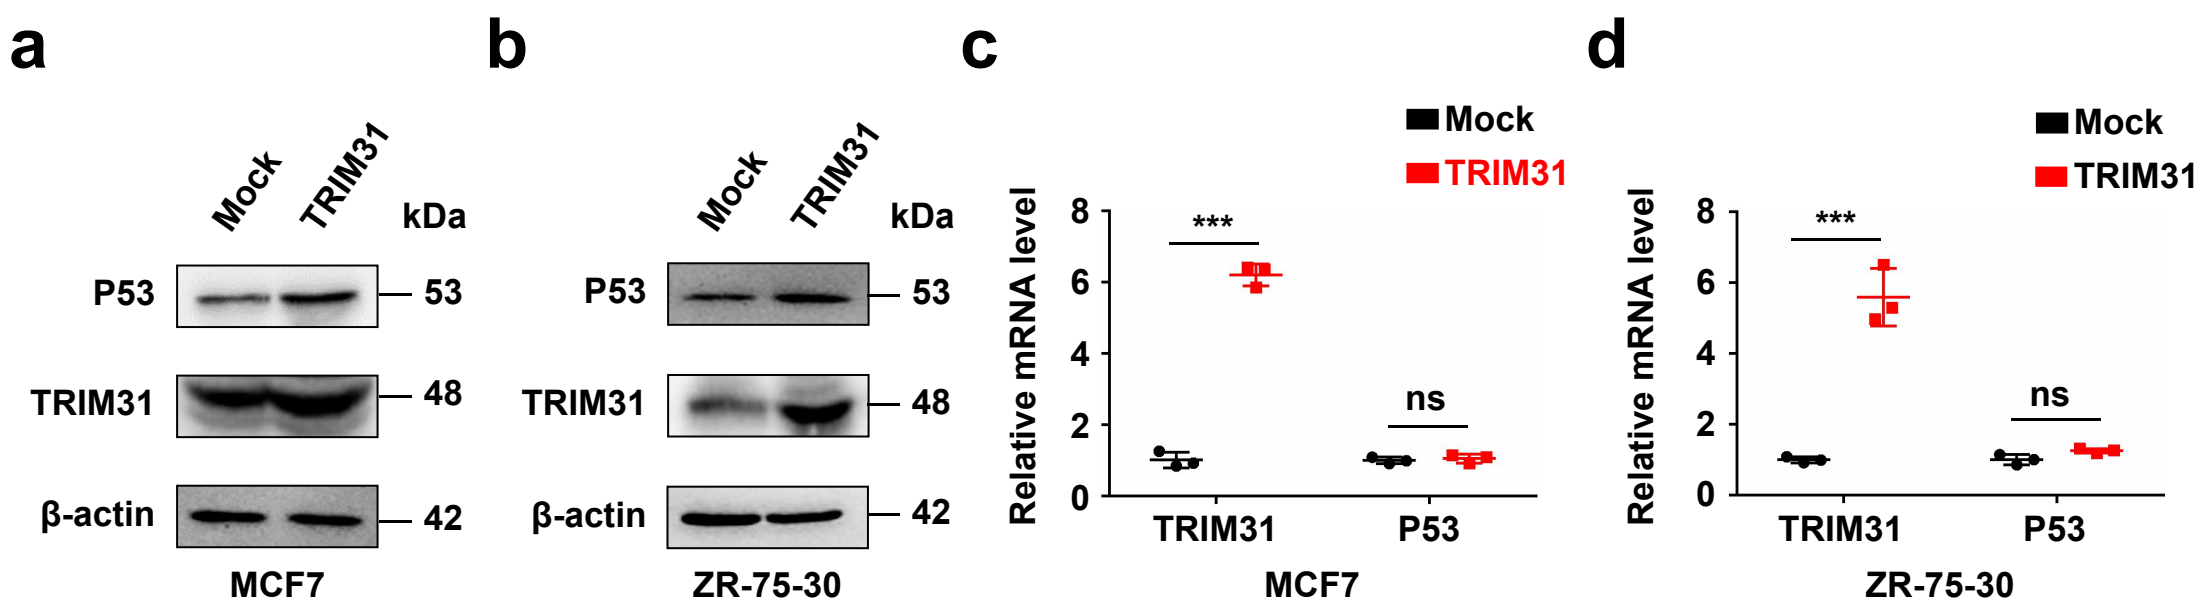

## Supplementary Fig. S3

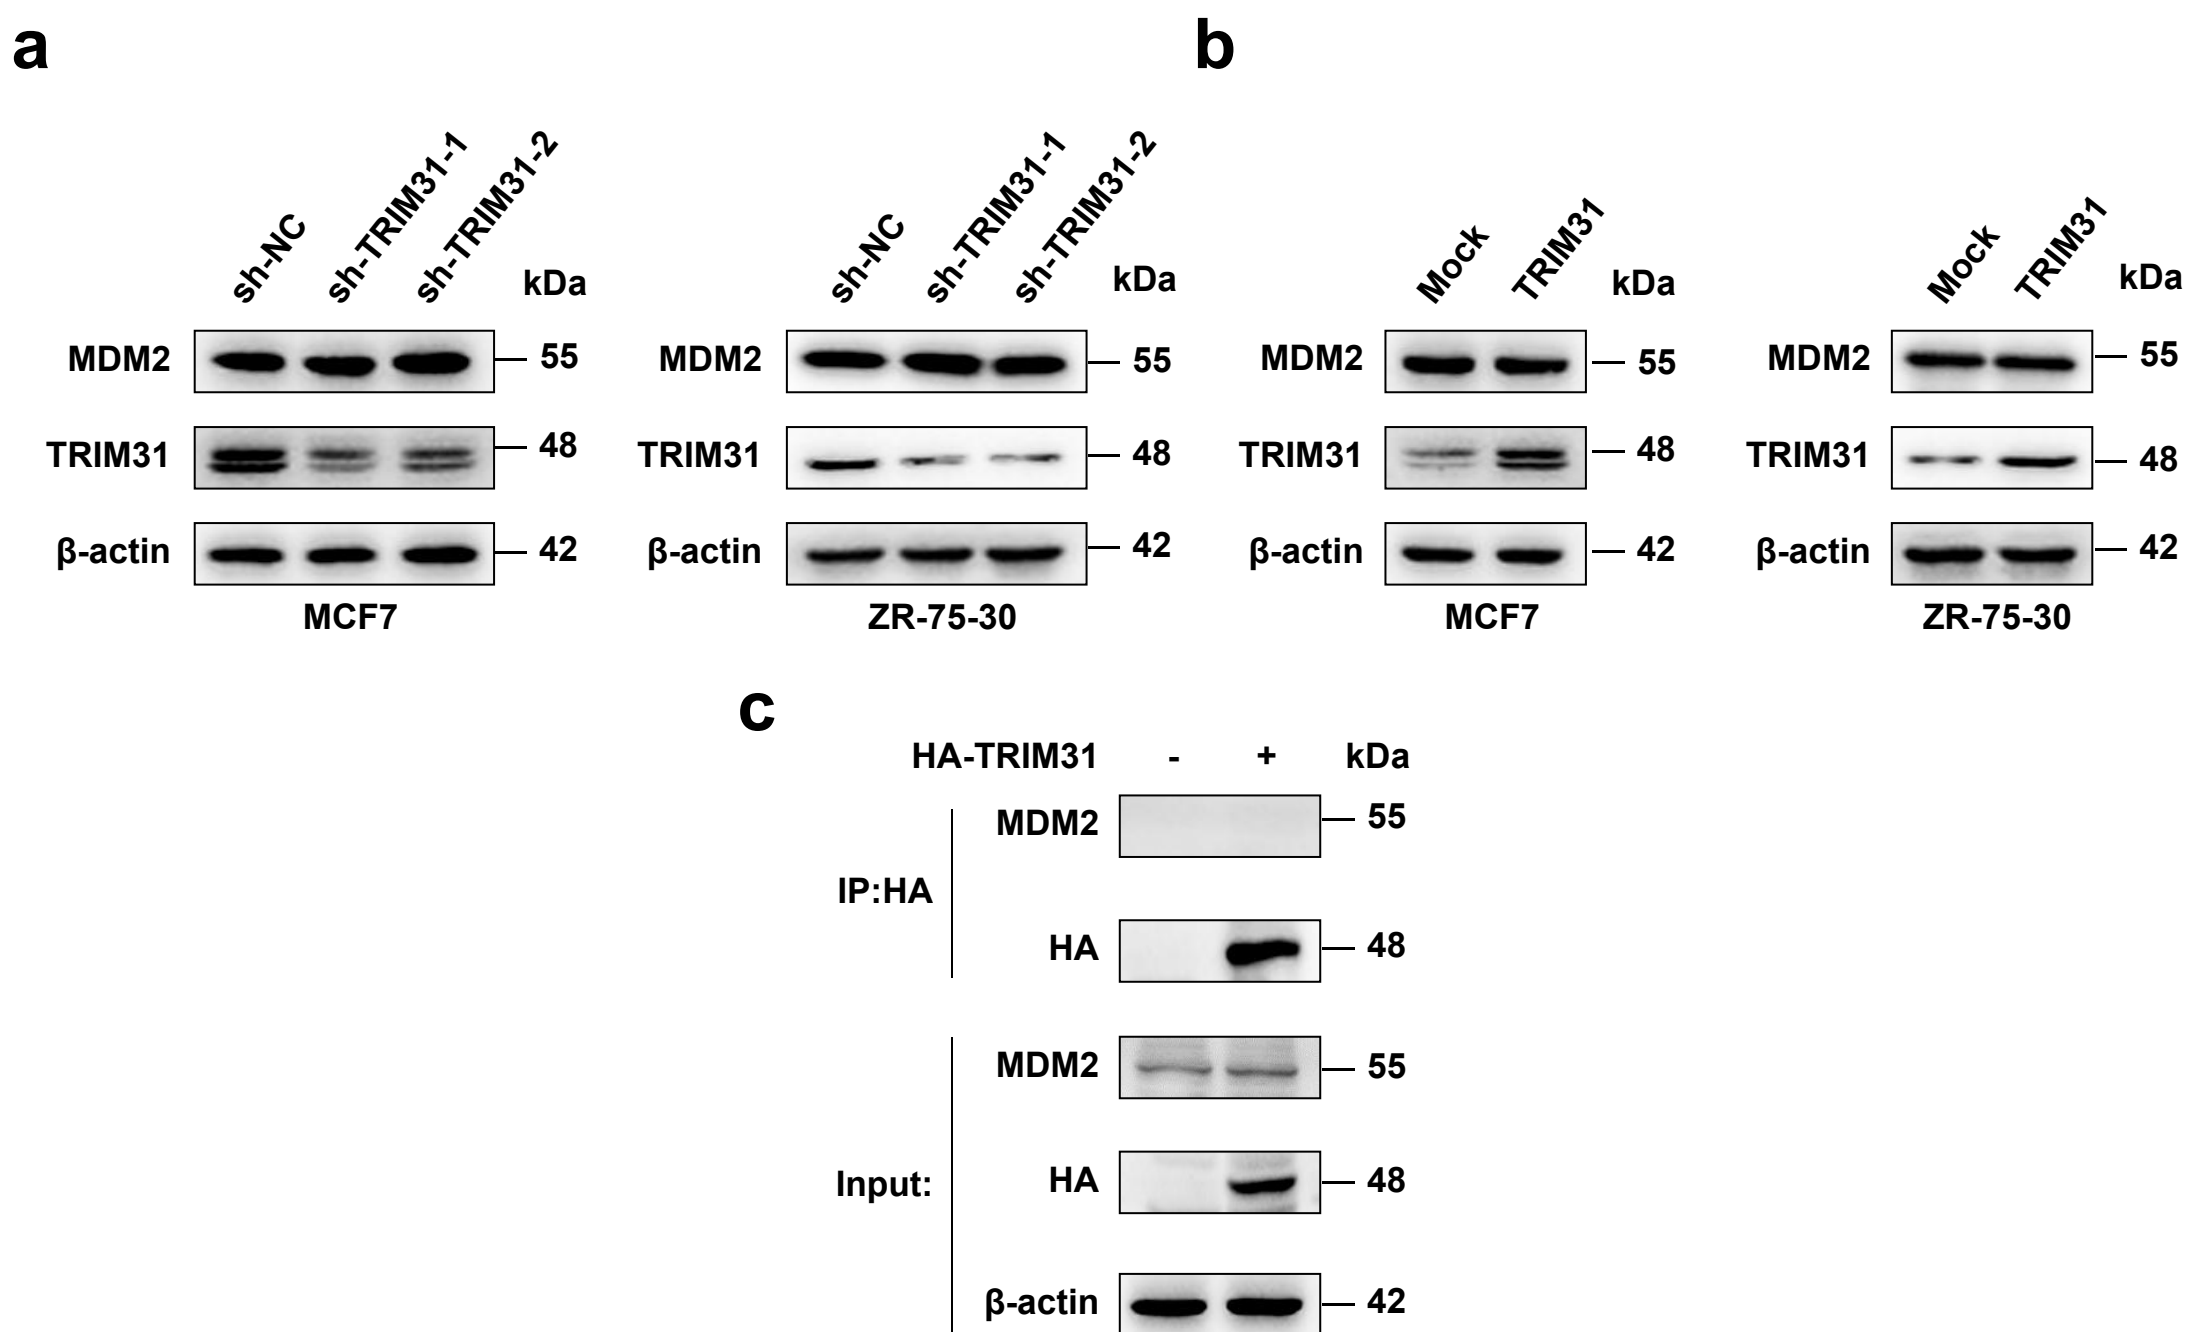

## Supplementary Fig. S4

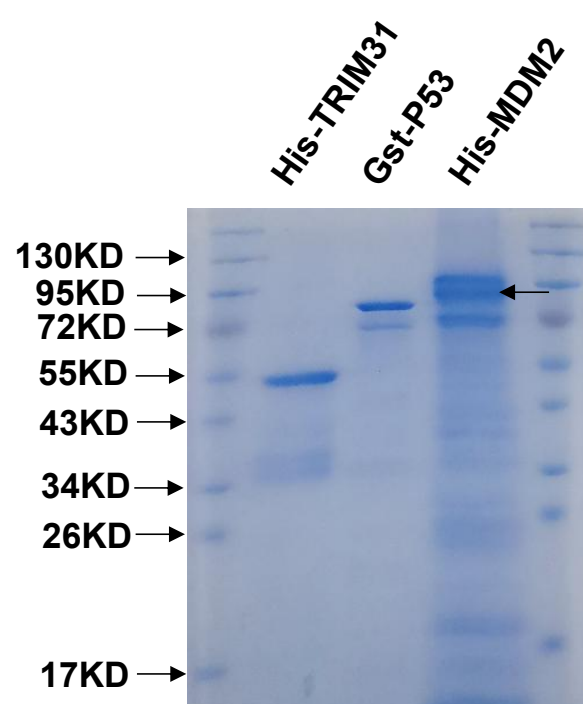

## Supplementary Fig. S5

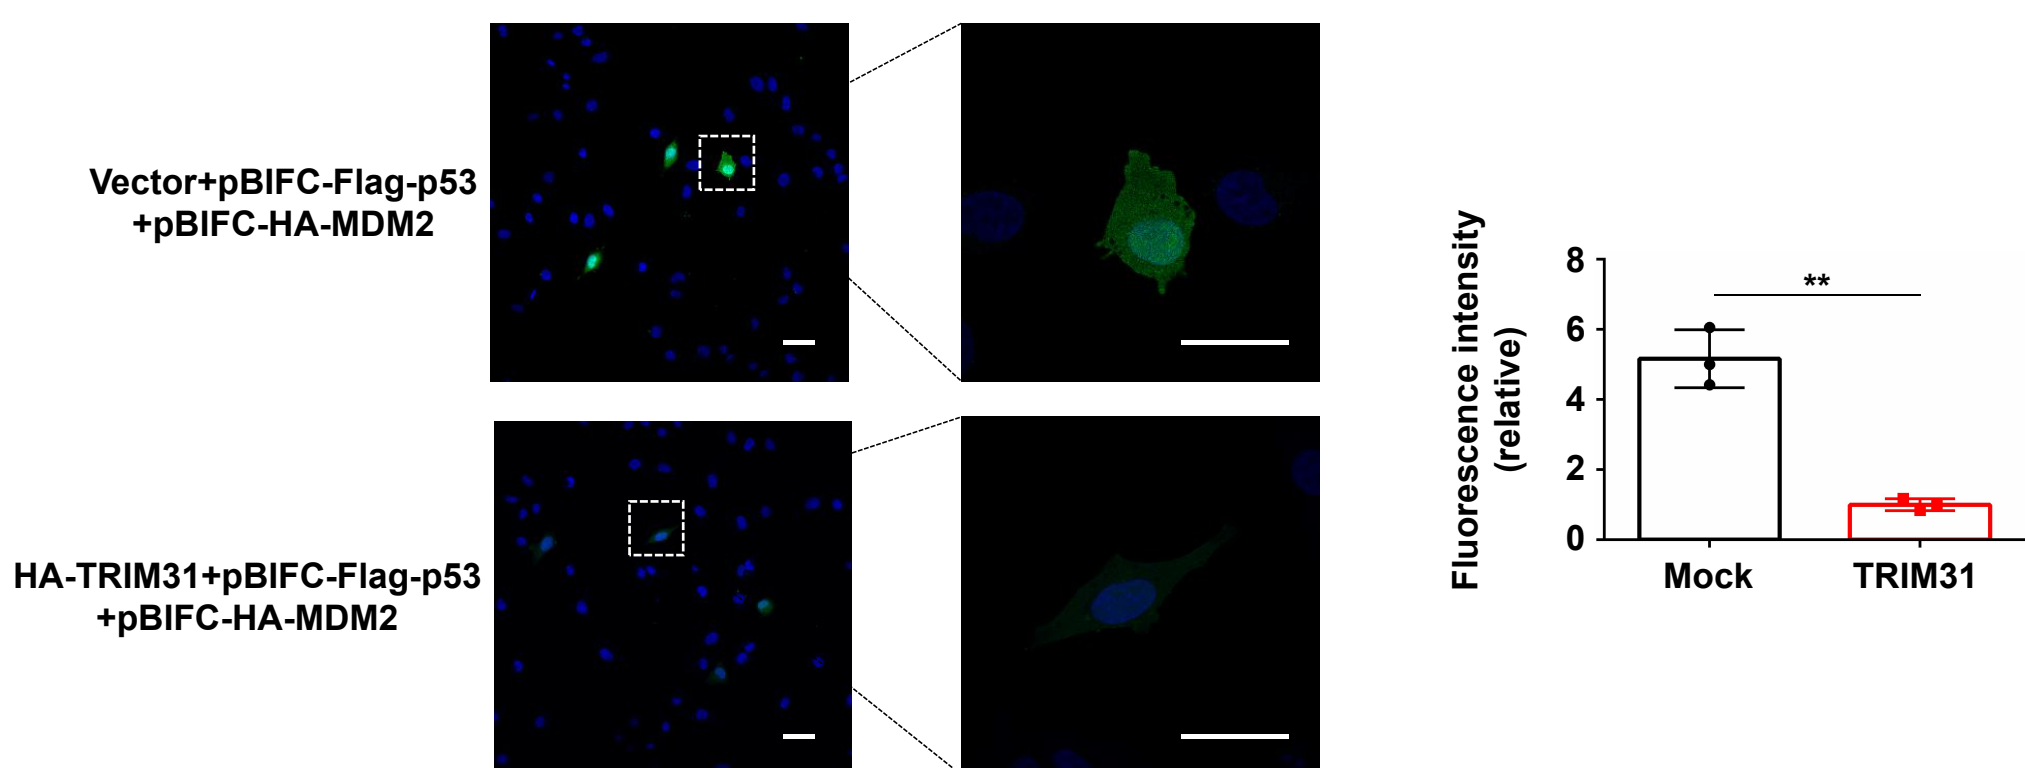

## Supplementary Fig. S6

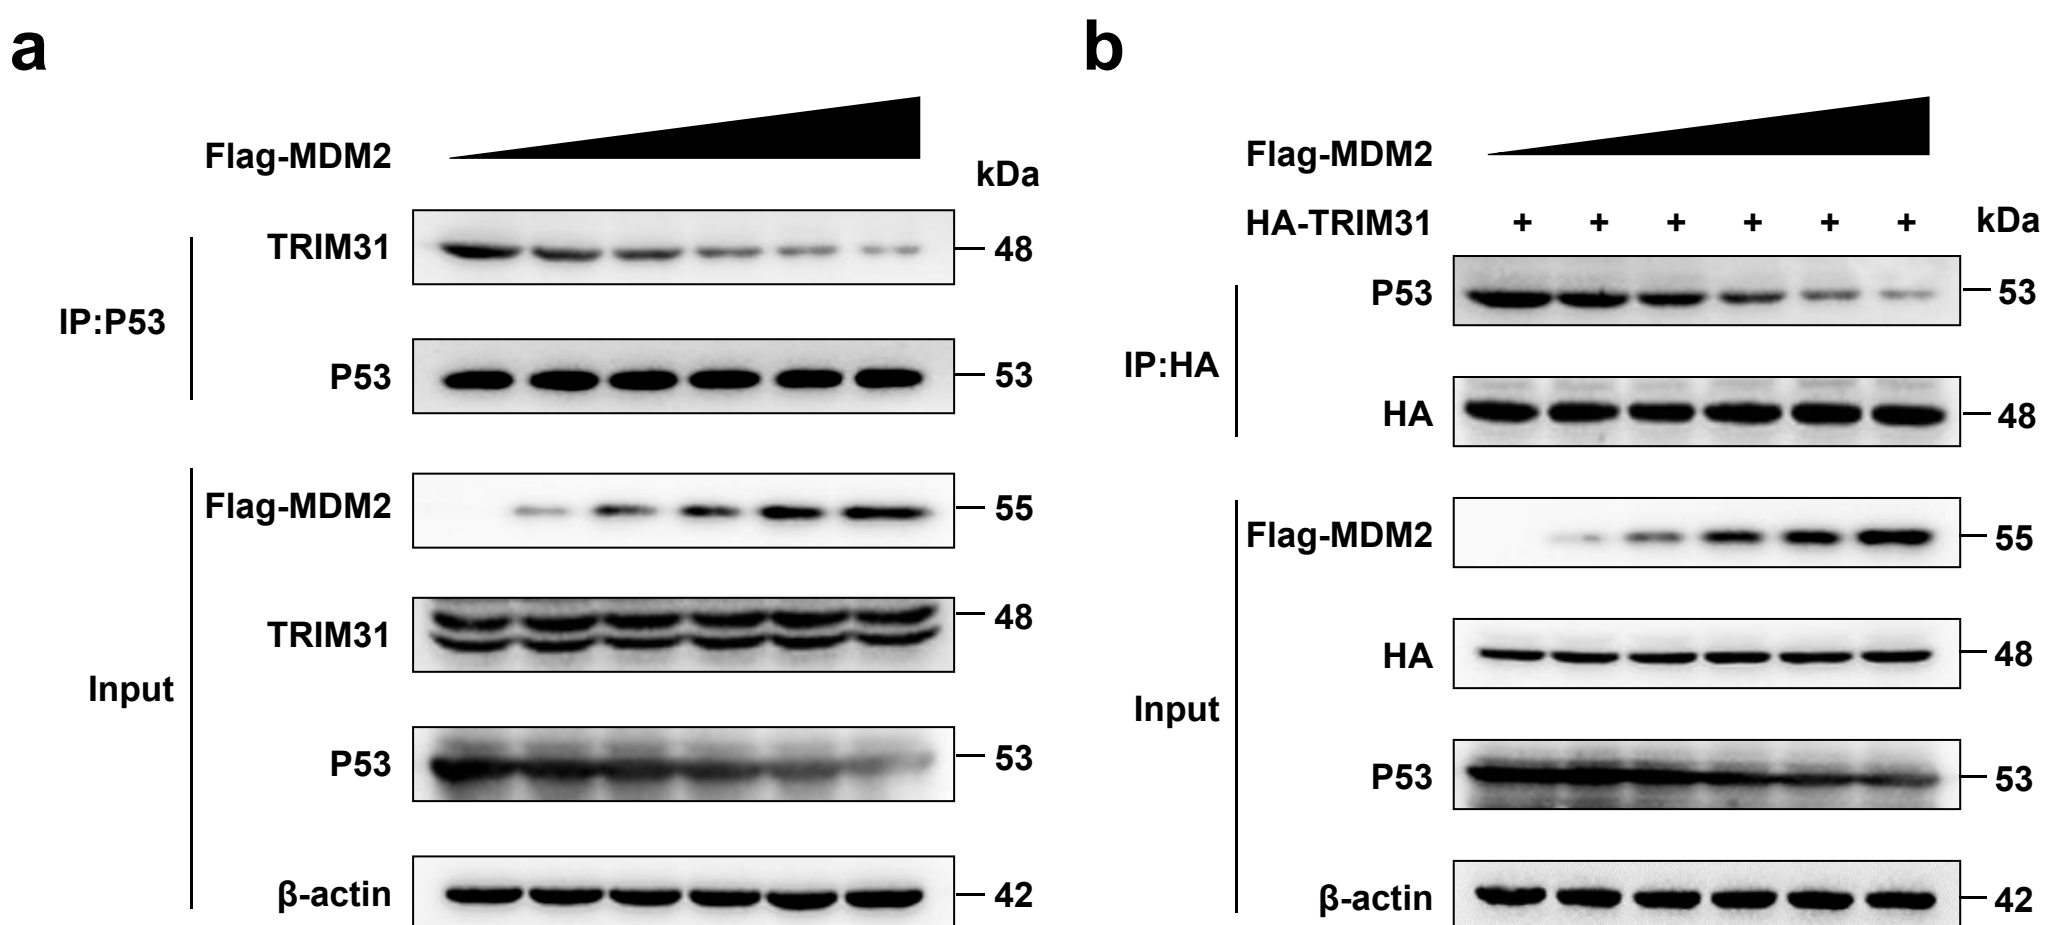

## Supplementary Fig. S7

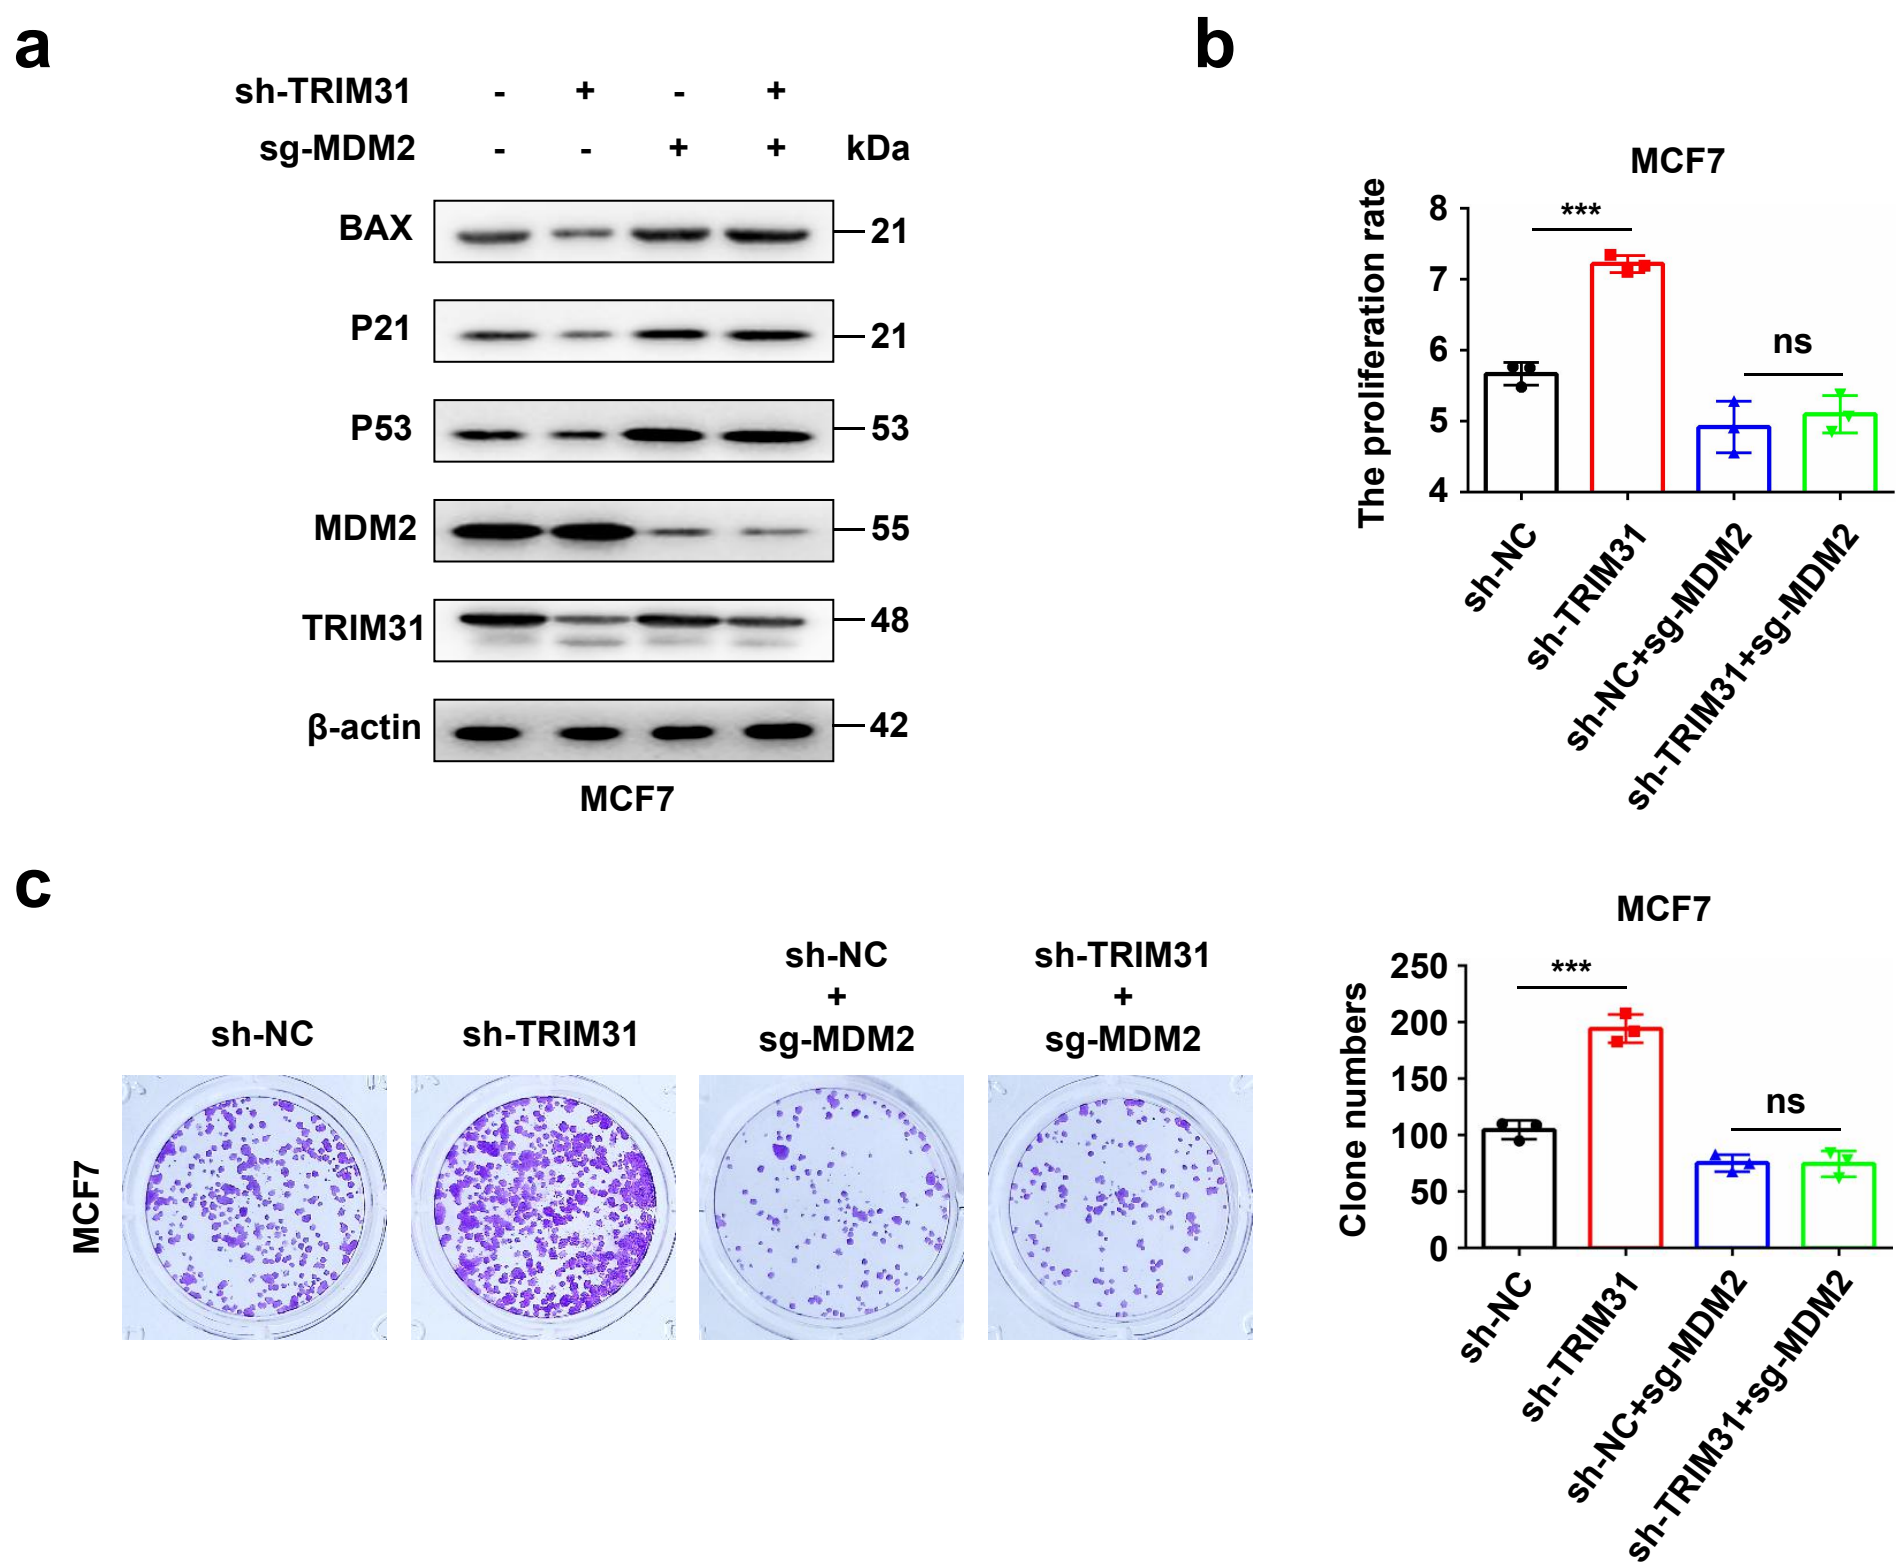

## Supplementary Fig. S8

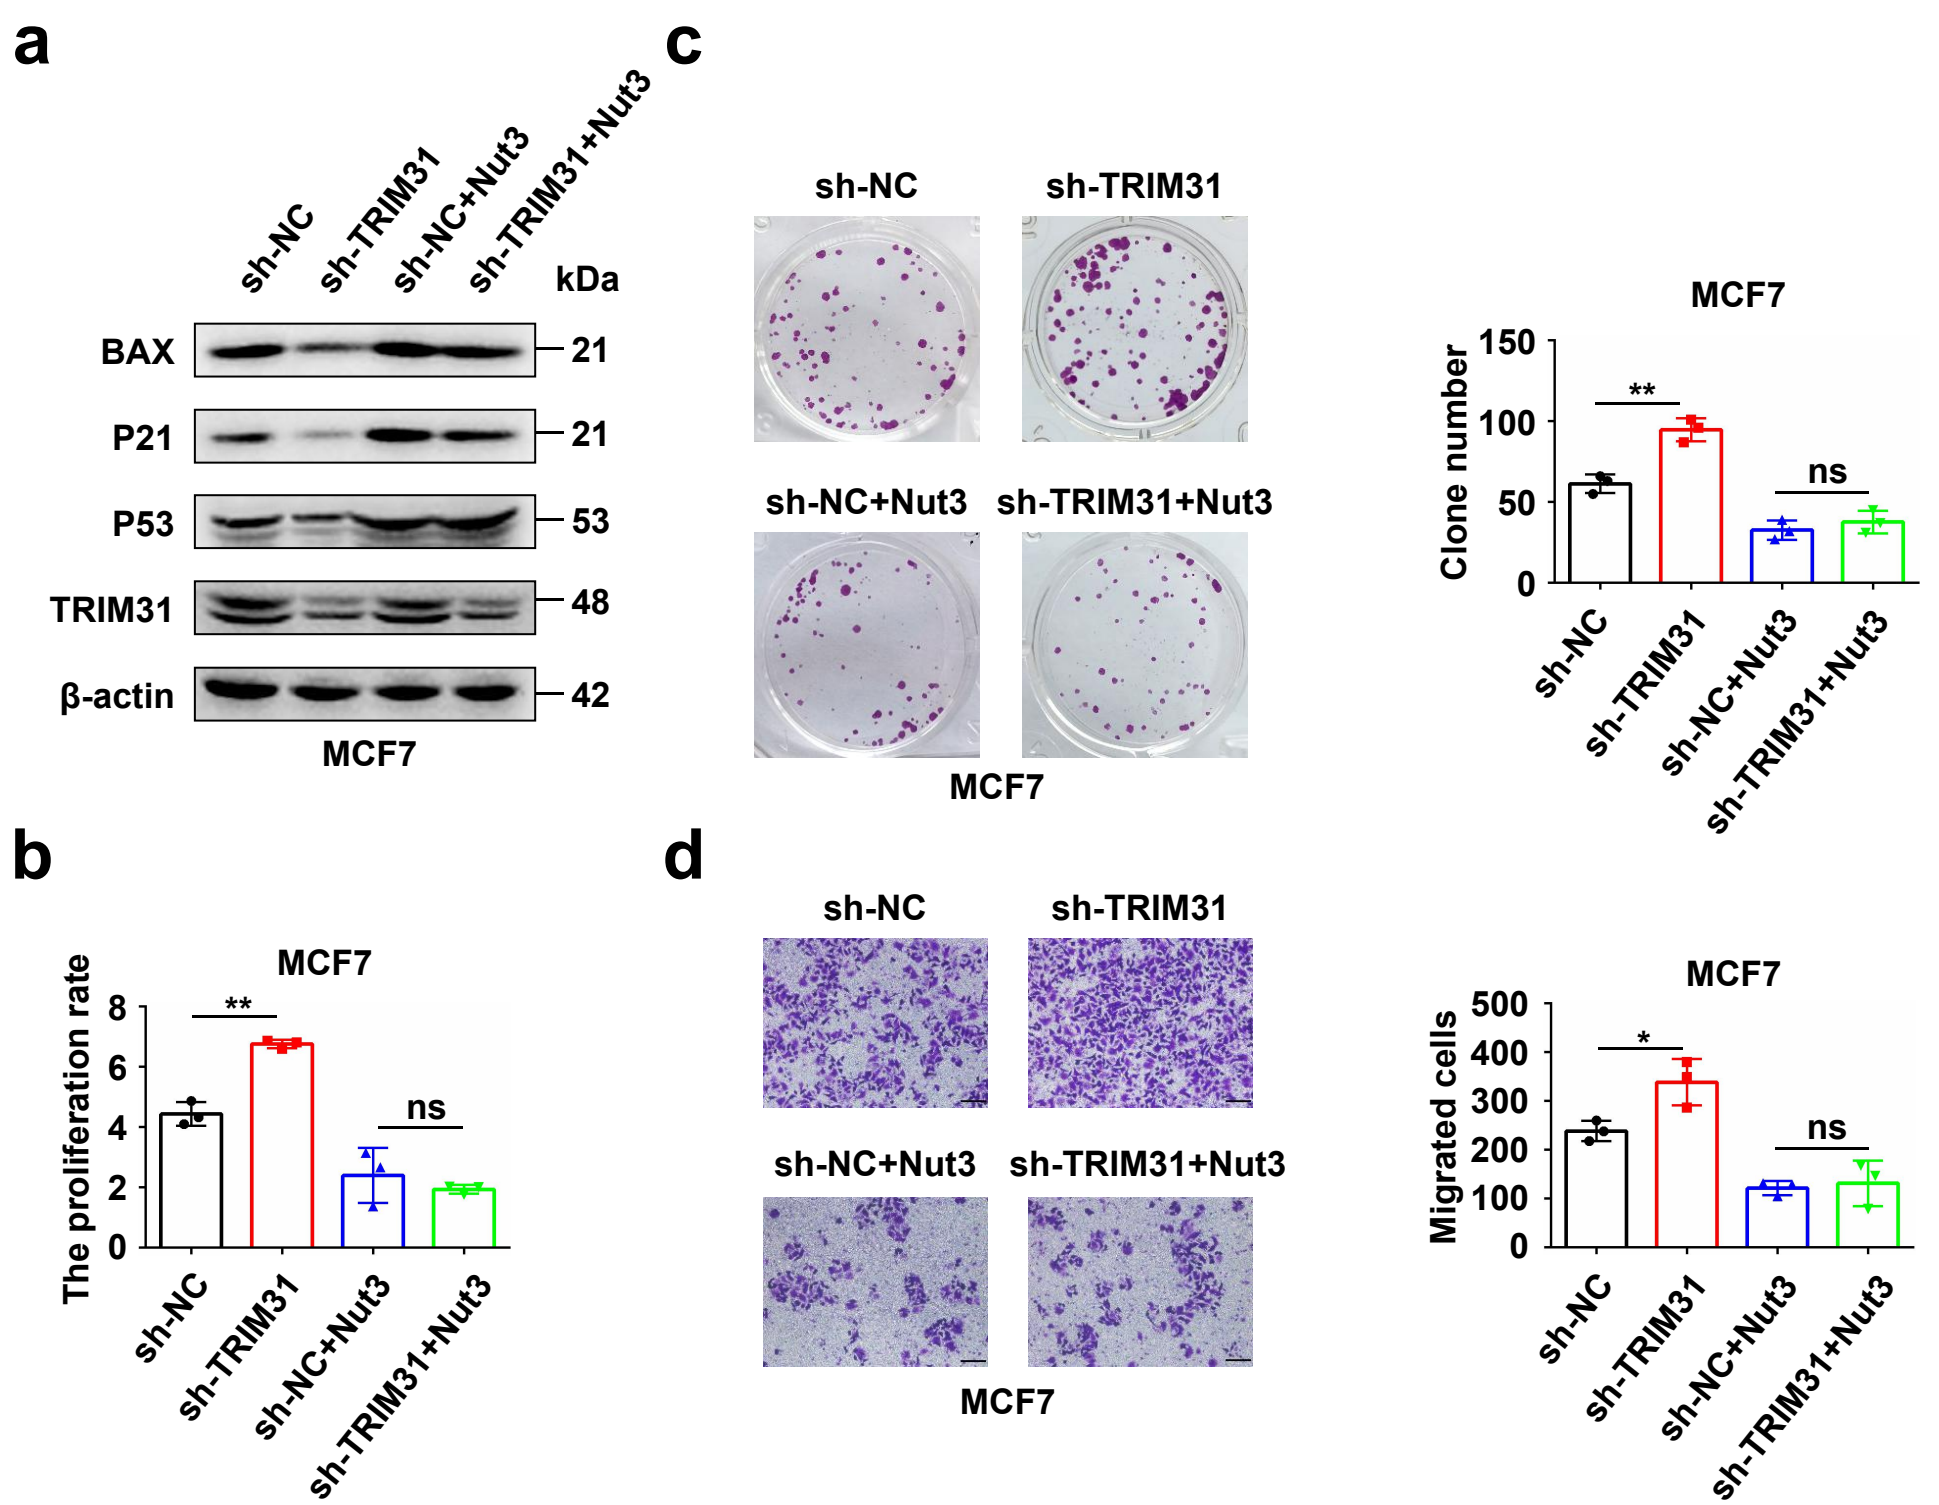

## Supplementary Fig. S9

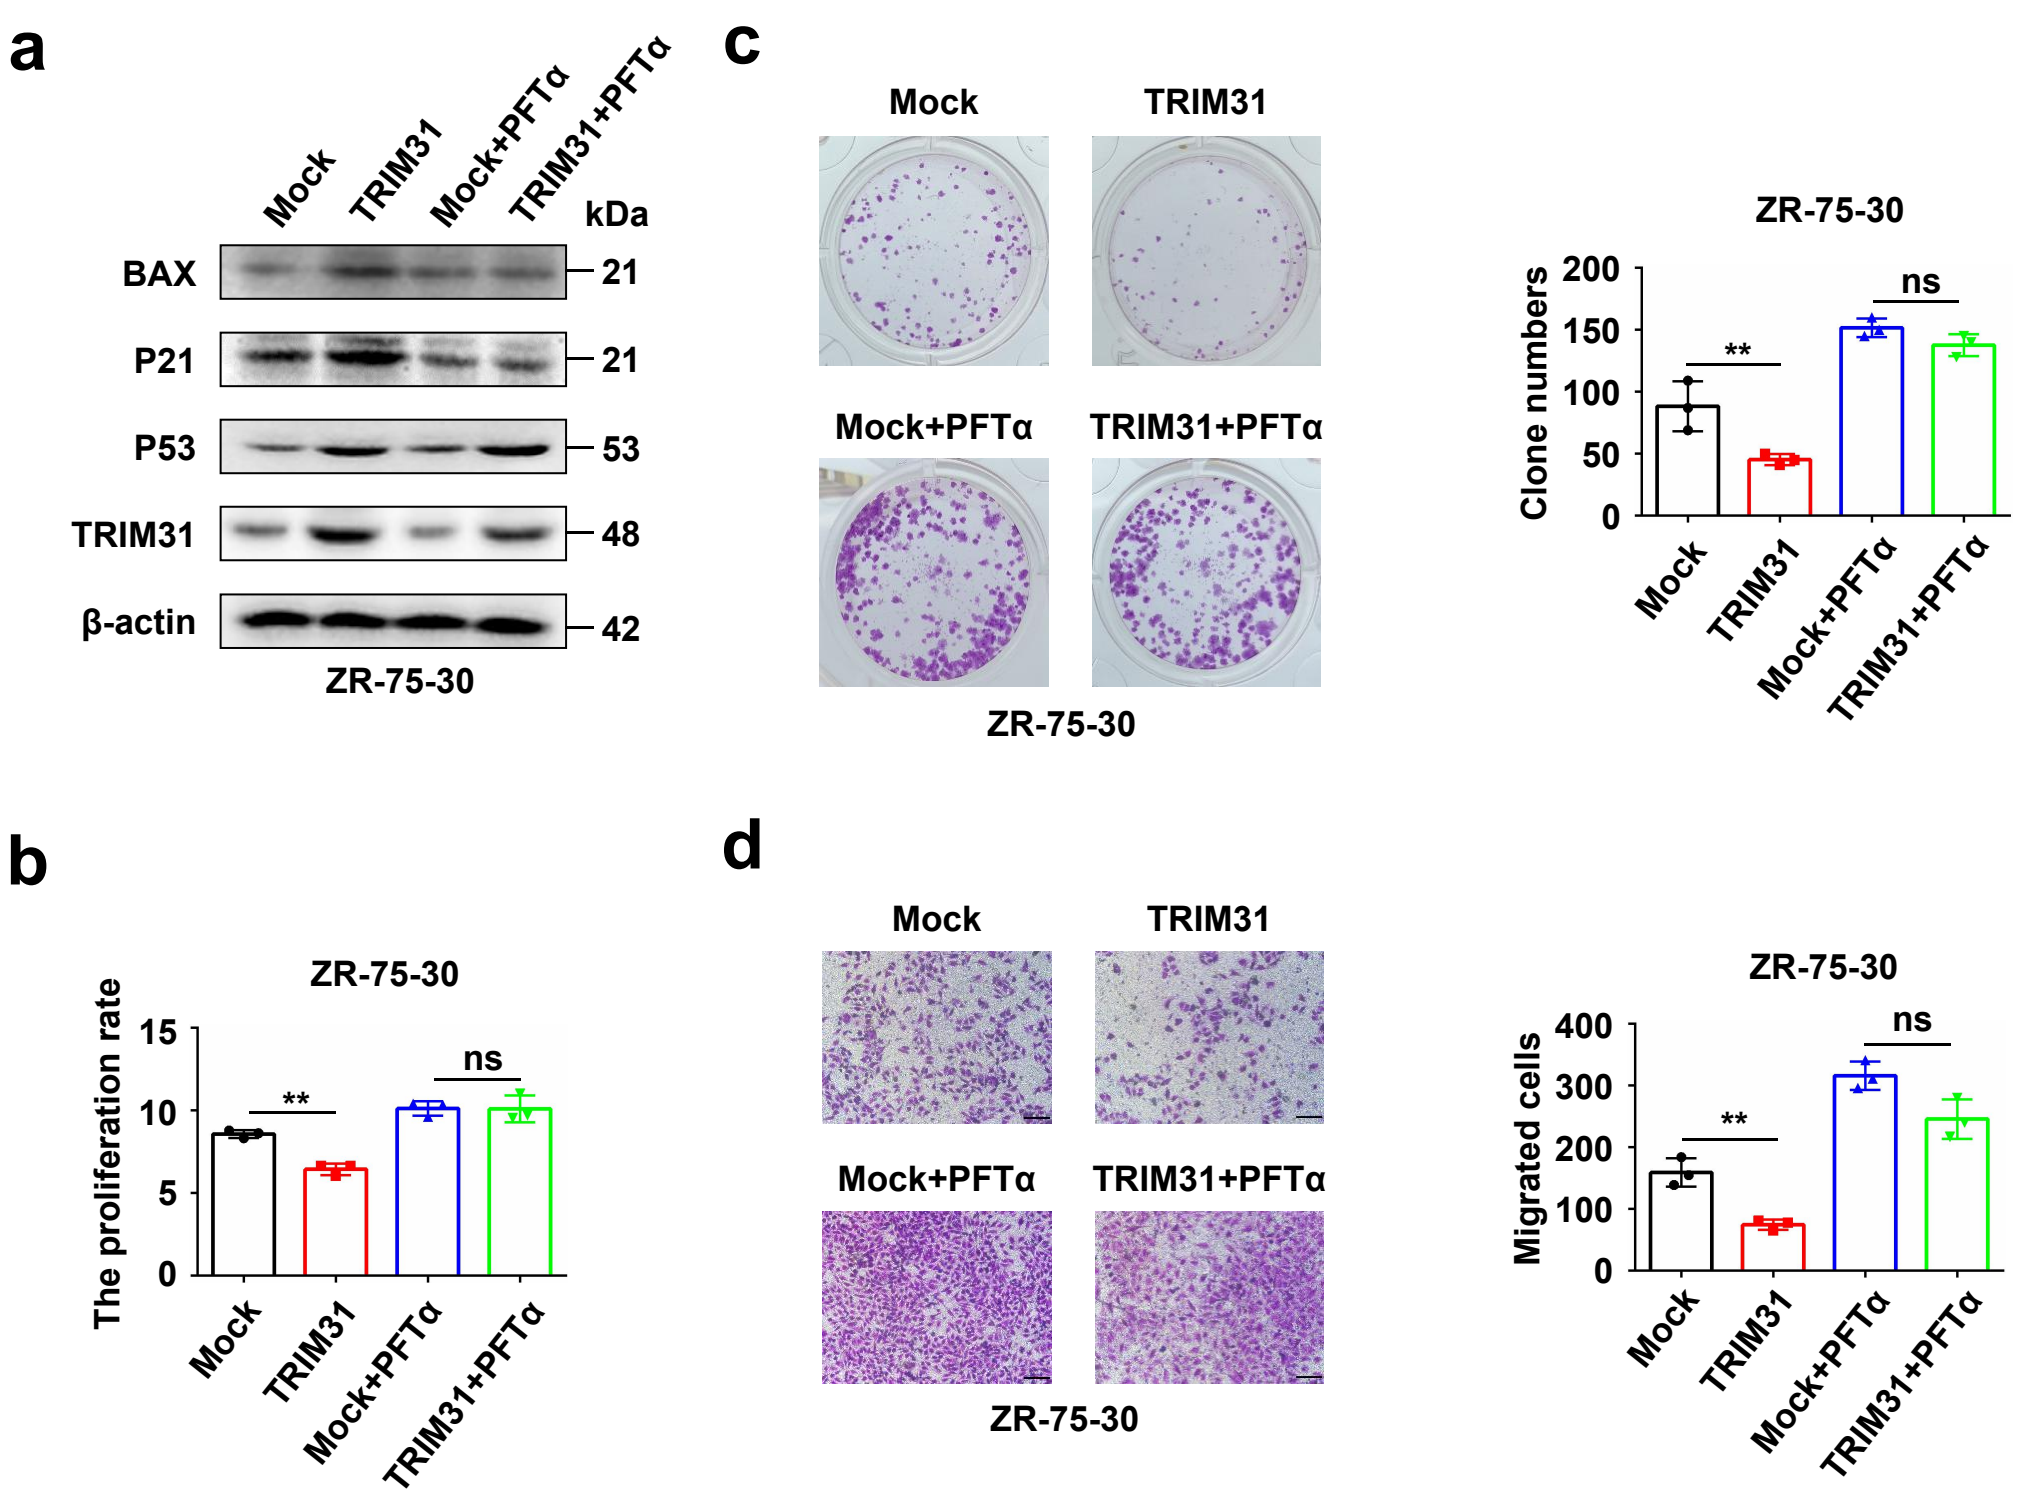

## Supplementary Fig. S10

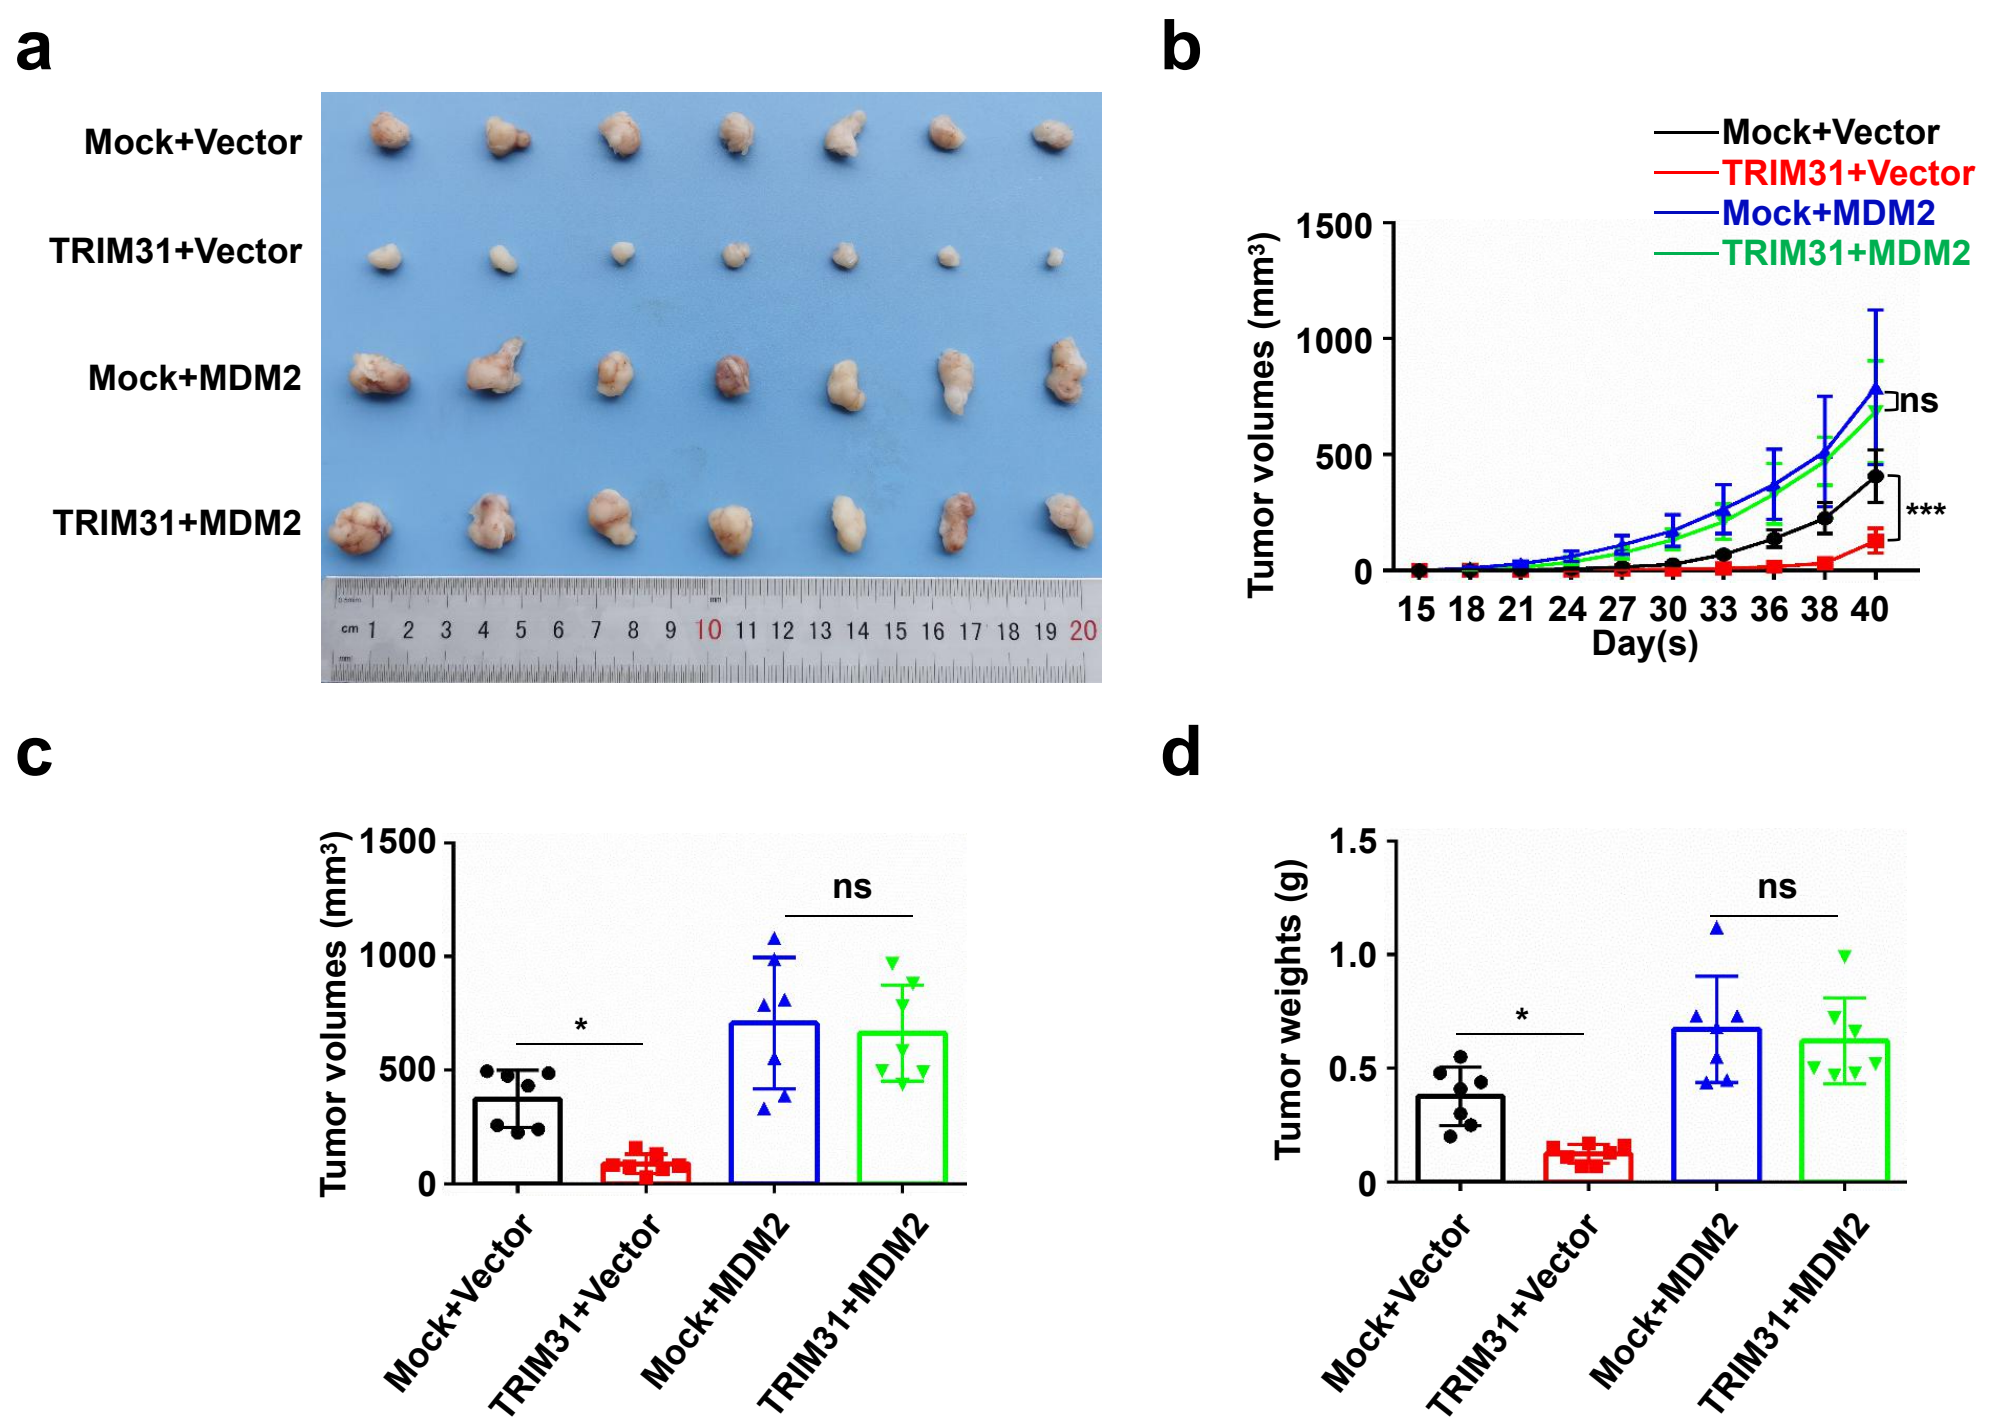



















|         |    |   |    |    |   |   |      |        |      |           |        |      |      |   |         |   |
|---------|----|---|----|----|---|---|------|--------|------|-----------|--------|------|------|---|---------|---|
| RBMXL1  | 7  | 1 | 6  | 5  | 1 | 1 | 16.7 | 42.141 | 390  | 0.0047059 | 6.2076 | 16.7 | 11.8 | 0 | 1192500 | 0 |
| RAN     | 1  | 1 | 0  | 1  | 0 | 1 | 10.2 | 14.731 | 128  | 0.0046948 | 6.2011 | 0    | 10.2 | 0 | 678110  | 0 |
| IPLL5   | 1  | 1 | 1  | 1  | 1 | 1 | 3.7  | 23.15  | 215  | 0.0046729 | 6.1897 | 3.7  | 3.7  | 0 | 1794500 | 0 |
| SH2D4A  | 1  | 1 | 0  | 1  | 0 | 1 | 6.3  | 22.649 | 189  | 0.0046512 | 6.1668 | 0    | 6.3  | 0 | 784930  | 0 |
| ARFGAP1 | 1  | 1 | 1  | 1  | 1 | 1 | 5.7  | 26.555 | 244  | 0.0046296 | 6.1491 | 5.7  | 5.7  | 0 | 102890  | 0 |
| ERH     | 1  | 1 | 0  | 1  | 0 | 1 | 15.5 | 8.2033 | 71   | 0.0046189 | 6.1339 | 0    | 15.5 | 0 | 486480  | 0 |
| PFN2    | 1  | 1 | 0  | 1  | 0 | 1 | 15.4 | 9.7982 | 91   | 0.0045977 | 6.0861 | 0    | 15.4 | 0 | 692560  | 0 |
| GSPT2   | 1  | 1 | 1  | 1  | 1 | 1 | 2.7  | 68.882 | 628  | 0.0068182 | 6.0292 | 2.7  | 2.7  | 0 | 191610  | 0 |
| KCTD19  | 1  | 1 | 0  | 1  | 0 | 1 | 2.7  | 104.94 | 926  | 1         | -2     | 0    | 2.7  | 0 | 145630  | 0 |
| DNAJC13 | 1  | 1 | 1  | 1  | 1 | 1 | 0.8  | 254.41 | 2243 | 1         | -2     | 0.8  | 0.8  | 0 | 789320  | 0 |
| TUBB3   | 13 | 0 | 13 | 13 | 0 | 0 | 15.9 | 88.381 | 797  | 1         | -2     | 15.9 | 15.9 | 0 | 206880  | 0 |

**Supplementary Table S3:**

**The correlation of TRIM31 expression and TP53 status of breast cancer patients (OS)**

| Parameters  | Cases | TRIM31 expression |      | <i>P</i> values |
|-------------|-------|-------------------|------|-----------------|
|             |       | Low               | High |                 |
|             | 327   | 163               | 164  |                 |
| TP53 status |       |                   |      | 0.964           |
| Wide type   | 197   | 98                | 99   |                 |
| Mutant      | 130   | 65                | 65   |                 |

**The correlation of TRIM31 expression and TP53 status of breast cancer patients (RFS)**

| Parameters  | Cases | TRIM31 expression |      | <i>P</i> values |
|-------------|-------|-------------------|------|-----------------|
|             |       | Low               | High |                 |
|             | 461   | 234               | 227  |                 |
| TP53 status |       |                   |      | 0.626           |
| Wide type   | 273   | 136               | 137  |                 |
| Mutant      | 188   | 98                | 90   |                 |
